# Supplementary material for: Serum Wisteria floribunda agglutinin-positive human Mac-2 binding protein is unsuitable as a diagnostic marker of occulthepatocellular carcinoma in end-stage liver cirrhosis
Source: Research Square preprint supplement (doi:10.21203/rs.3.rs-1543103/v1), 2022-04-26
Supplement: Supplementary file 1 [file f479a5044277eb9ebc817e73.docx]

**Table 1**

Characteristics of each group.


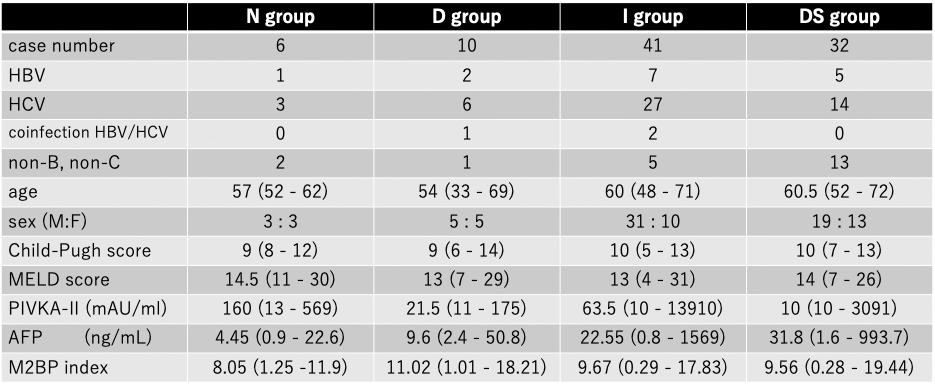


HBV, hepatitis B virus; HCV, hepatitis C virus; MELD score, a model for end-stage liver disease score; PIVKA-II, protein induced by vitamin K absence or antagonists-II, AFP: α-fetoprotein
